# Supplementary material for: A phase II study of everolimus in patients with advanced solid malignancies with TSC1, TSC2, NF1, NF2 or STK11 mutations
Source: PubMed Central journal article supplement — J Thorac Dis. 2021 Jul;13(7):4054–62. doi: 10.21037/jtd-21-195 (PMC8339787; doi:10.21037/jtd-21-195), 2021-07
Supplement: jtd-13-07-4054-coif.pdf [file jtd-13-07-4054-coif.pdf]

## ICMJE DISCLOSURE FORM

**Date:** 4-22-2021

**Your Name:** Siddhartha Devarakonda

**Manuscript Title:** A phase II study of everolimus in patients with advanced solid malignancies with TSC1, TSC2, NF1, NF2 or STK11 mutations

**Manuscript number (if known):**JTD-21-195-CL

In the interest of transparency, we ask you to disclose all relationships/activities/interests listed below that are related to the content of your manuscript. "Related" means any relation with for-profit or not-for-profit third parties whose interests may be affected by the content of the manuscript. Disclosure represents a commitment to transparency and does not necessarily indicate a bias. If you are in doubt about whether to list a relationship/activity/interest, it is preferable that you do so.

The following questions apply to the author's relationships/activities/interests as they relate to the current manuscript only.

The author's relationships/activities/interests should be defined broadly. For example, if your manuscript pertains to the epidemiology of hypertension, you should declare all relationships with manufacturers of antihypertensive medication, even if that medication is not mentioned in the manuscript.

In item #1 below, report all support for the work reported in this manuscript without time limit. For all other items, the time frame for disclosure is the past 36 months.

|                                                           |                                                                                                                                                                                | Name all entities with whom you have this relationship or indicate none (add rows as needed) | Specifications/Comments (e.g., if payments were made to you or to your institution) |
|-----------------------------------------------------------|--------------------------------------------------------------------------------------------------------------------------------------------------------------------------------|----------------------------------------------------------------------------------------------|-------------------------------------------------------------------------------------|
| <b>Time frame: Since the initial planning of the work</b> |                                                                                                                                                                                |                                                                                              |                                                                                     |
| 1                                                         | All support for the present manuscript (e.g., funding, provision of study materials, medical writing, article processing charges, etc.)<br><b>No time limit for this item.</b> | <u>  X  </u> None                                                                            |                                                                                     |
|                                                           |                                                                                                                                                                                |                                                                                              |                                                                                     |
|                                                           |                                                                                                                                                                                |                                                                                              |                                                                                     |
|                                                           |                                                                                                                                                                                |                                                                                              |                                                                                     |
|                                                           |                                                                                                                                                                                |                                                                                              |                                                                                     |
| <b>Time frame: past 36 months</b>                         |                                                                                                                                                                                |                                                                                              |                                                                                     |
| 2                                                         | Grants or contracts from any entity (if not indicated in item #1 above).                                                                                                       | <u>  X  </u> None                                                                            |                                                                                     |
|                                                           |                                                                                                                                                                                |                                                                                              |                                                                                     |
| 3                                                         | Royalties or licenses                                                                                                                                                          | <u>  X  </u> None                                                                            |                                                                                     |
|                                                           |                                                                                                                                                                                |                                                                                              |                                                                                     |
| 4                                                         | Consulting fees                                                                                                                                                                | <u>  X  </u> None                                                                            |                                                                                     |
|                                                           |                                                                                                                                                                                |                                                                                              |                                                                                     |

|    |                                                                                                              |                                          |  |
|----|--------------------------------------------------------------------------------------------------------------|------------------------------------------|--|
|    |                                                                                                              |                                          |  |
| 5  | Payment or honoraria for lectures, presentations, speakers bureaus, manuscript writing or educational events | <input checked="" type="checkbox"/> None |  |
| 6  | Payment for expert testimony                                                                                 | <input checked="" type="checkbox"/> None |  |
| 7  | Support for attending meetings and/or travel                                                                 | <input checked="" type="checkbox"/> None |  |
| 8  | Patents planned, issued or pending                                                                           | <input checked="" type="checkbox"/> None |  |
| 9  | Participation on a Data Safety Monitoring Board or Advisory Board                                            | <input checked="" type="checkbox"/> None |  |
| 10 | Leadership or fiduciary role in other board, society, committee or advocacy group, paid or unpaid            | <input checked="" type="checkbox"/> None |  |
| 11 | Stock or stock options                                                                                       | <input checked="" type="checkbox"/> None |  |
| 12 | Receipt of equipment, materials, drugs, medical writing, gifts or other services                             | <input checked="" type="checkbox"/> None |  |
| 13 | Other financial or non-financial interests                                                                   | <input checked="" type="checkbox"/> None |  |

**Please summarize the above conflict of interest in the following box:**

**Please place an "X" next to the following statement to indicate your agreement:**

**X I certify that I have answered every question and have not altered the wording of any of the questions on this form.**

## ICMJE DISCLOSURE FORM

**Date:** 4-21-2021

**Your Name:** Bruna Pellini

**Manuscript Title:** A phase II study of everolimus in patients with advanced solid malignancies with TSC1, TSC2, NF1, NF2 or STK11 mutations

**Manuscript number (if known):**JTD-21-195-CL

In the interest of transparency, we ask you to disclose all relationships/activities/interests listed below that are related to the content of your manuscript. “Related” means any relation with for-profit or not-for-profit third parties whose interests may be affected by the content of the manuscript. Disclosure represents a commitment to transparency and does not necessarily indicate a bias. If you are in doubt about whether to list a relationship/activity/interest, it is preferable that you do so.

The following questions apply to the author’s relationships/activities/interests as they relate to the current manuscript only.

The author’s relationships/activities/interests should be defined broadly. For example, if your manuscript pertains to the epidemiology of hypertension, you should declare all relationships with manufacturers of antihypertensive medication, even if that medication is not mentioned in the manuscript.

In item #1 below, report all support for the work reported in this manuscript without time limit. For all other items, the time frame for disclosure is the past 36 months.

|                                                           |                                                                                                                                                                                | Name all entities with whom you have this relationship or indicate none (add rows as needed) | Specifications/Comments (e.g., if payments were made to you or to your institution) |
|-----------------------------------------------------------|--------------------------------------------------------------------------------------------------------------------------------------------------------------------------------|----------------------------------------------------------------------------------------------|-------------------------------------------------------------------------------------|
| <b>Time frame: Since the initial planning of the work</b> |                                                                                                                                                                                |                                                                                              |                                                                                     |
| 1                                                         | All support for the present manuscript (e.g., funding, provision of study materials, medical writing, article processing charges, etc.)<br><b>No time limit for this item.</b> | X None                                                                                       |                                                                                     |
|                                                           |                                                                                                                                                                                |                                                                                              |                                                                                     |
|                                                           |                                                                                                                                                                                |                                                                                              |                                                                                     |
|                                                           |                                                                                                                                                                                |                                                                                              |                                                                                     |
|                                                           |                                                                                                                                                                                |                                                                                              |                                                                                     |
|                                                           |                                                                                                                                                                                |                                                                                              |                                                                                     |
| <b>Time frame: past 36 months</b>                         |                                                                                                                                                                                |                                                                                              |                                                                                     |
| 2                                                         | Grants or contracts from any entity (if not indicated in item #1 above).                                                                                                       | BMS                                                                                          | September/2020-present                                                              |
|                                                           |                                                                                                                                                                                |                                                                                              |                                                                                     |
| 3                                                         | Royalties or licenses                                                                                                                                                          | X None                                                                                       |                                                                                     |
|                                                           |                                                                                                                                                                                |                                                                                              |                                                                                     |
| 4                                                         | Consulting fees                                                                                                                                                                |                                                                                              |                                                                                     |
|                                                           |                                                                                                                                                                                | Guidepoint                                                                                   | Paid to provider                                                                    |

|    |                                                                                                              |                                                                                                         |                                                               |
|----|--------------------------------------------------------------------------------------------------------------|---------------------------------------------------------------------------------------------------------|---------------------------------------------------------------|
|    |                                                                                                              |                                                                                                         |                                                               |
| 5  | Payment or honoraria for lectures, presentations, speakers bureaus, manuscript writing or educational events | <input type="checkbox"/> None<br><input type="checkbox"/> BioAscend<br><input type="checkbox"/> OncLive |                                                               |
| 6  | Payment for expert testimony                                                                                 | <input type="checkbox"/> None                                                                           |                                                               |
| 7  | Support for attending meetings and/or travel                                                                 | <input checked="" type="checkbox"/> None                                                                |                                                               |
| 8  | Patents planned, issued or pending                                                                           | <input checked="" type="checkbox"/> None                                                                |                                                               |
| 9  | Participation on a Data Safety Monitoring Board or Advisory Board                                            | <input type="checkbox"/> AstraZeneca                                                                    |                                                               |
| 10 | Leadership or fiduciary role in other board, society, committee or advocacy group, paid or unpaid            | <input checked="" type="checkbox"/> None                                                                |                                                               |
| 11 | Stock or stock options                                                                                       | <input checked="" type="checkbox"/> None                                                                |                                                               |
| 12 | Receipt of equipment, materials, drugs, medical writing, gifts or other services                             | <input type="checkbox"/> Roche                                                                          | <input type="checkbox"/> Assay Suply from July/2019-July/2020 |
| 13 | Other financial or non-financial interests                                                                   | <input checked="" type="checkbox"/> None                                                                |                                                               |

Please summarize the above conflict of interest in the following box:

Dr. Pellini receives research support from Bristol Myers Squibb, has received speaker honoraria from BioAscend and OncLive, has serve as a consultant for AstraZeneca and Guidepoint, and has received assay supply by Roche.

Please place an "X" next to the following statement to indicate your agreement:

I certify that I have answered every question and have not altered the wording of any of the questions on this form.

## ICMJE DISCLOSURE FORM

**Date:** 4-22-2021

**Your Name:** Luke Verghese

**Manuscript Title:** A phase II study of everolimus in patients with advanced solid malignancies with TSC1, TSC2, NF1, NF2 or STK11 mutations

**Manuscript number (if known):**JTD-21-195-CL

In the interest of transparency, we ask you to disclose all relationships/activities/interests listed below that are related to the content of your manuscript. "Related" means any relation with for-profit or not-for-profit third parties whose interests may be affected by the content of the manuscript. Disclosure represents a commitment to transparency and does not necessarily indicate a bias. If you are in doubt about whether to list a relationship/activity/interest, it is preferable that you do so.

The following questions apply to the author's relationships/activities/interests as they relate to the current manuscript only.

The author's relationships/activities/interests should be defined broadly. For example, if your manuscript pertains to the epidemiology of hypertension, you should declare all relationships with manufacturers of antihypertensive medication, even if that medication is not mentioned in the manuscript.

In item #1 below, report all support for the work reported in this manuscript without time limit. For all other items, the time frame for disclosure is the past 36 months.

|                                                           |                                                                                                                                                                                | Name all entities with whom you have this relationship or indicate none (add rows as needed) | Specifications/Comments (e.g., if payments were made to you or to your institution) |
|-----------------------------------------------------------|--------------------------------------------------------------------------------------------------------------------------------------------------------------------------------|----------------------------------------------------------------------------------------------|-------------------------------------------------------------------------------------|
| <b>Time frame: Since the initial planning of the work</b> |                                                                                                                                                                                |                                                                                              |                                                                                     |
| 1                                                         | All support for the present manuscript (e.g., funding, provision of study materials, medical writing, article processing charges, etc.)<br><b>No time limit for this item.</b> | <u> X </u> None                                                                              |                                                                                     |
|                                                           |                                                                                                                                                                                |                                                                                              |                                                                                     |
|                                                           |                                                                                                                                                                                |                                                                                              |                                                                                     |
|                                                           |                                                                                                                                                                                |                                                                                              |                                                                                     |
|                                                           |                                                                                                                                                                                |                                                                                              |                                                                                     |
|                                                           |                                                                                                                                                                                |                                                                                              |                                                                                     |
| <b>Time frame: past 36 months</b>                         |                                                                                                                                                                                |                                                                                              |                                                                                     |
| 2                                                         | Grants or contracts from any entity (if not indicated in item #1 above).                                                                                                       | <u> X </u> None                                                                              |                                                                                     |
|                                                           |                                                                                                                                                                                |                                                                                              |                                                                                     |
| 3                                                         | Royalties or licenses                                                                                                                                                          | <u> X </u> None                                                                              |                                                                                     |
|                                                           |                                                                                                                                                                                |                                                                                              |                                                                                     |
| 4                                                         | Consulting fees                                                                                                                                                                | Jounce Therapeutics                                                                          | Unpaid                                                                              |
|                                                           |                                                                                                                                                                                |                                                                                              |                                                                                     |

|    |                                                                                                              |                                          |  |
|----|--------------------------------------------------------------------------------------------------------------|------------------------------------------|--|
|    |                                                                                                              |                                          |  |
| 5  | Payment or honoraria for lectures, presentations, speakers bureaus, manuscript writing or educational events | <input checked="" type="checkbox"/> None |  |
| 6  | Payment for expert testimony                                                                                 | <input checked="" type="checkbox"/> None |  |
| 7  | Support for attending meetings and/or travel                                                                 | <input checked="" type="checkbox"/> None |  |
| 8  | Patents planned, issued or pending                                                                           | <input checked="" type="checkbox"/> None |  |
| 9  | Participation on a Data Safety Monitoring Board or Advisory Board                                            | <input checked="" type="checkbox"/> None |  |
| 10 | Leadership or fiduciary role in other board, society, committee or advocacy group, paid or unpaid            | <input checked="" type="checkbox"/> None |  |
| 11 | Stock or stock options                                                                                       | <input checked="" type="checkbox"/> None |  |
| 12 | Receipt of equipment, materials, drugs, medical writing, gifts or other services                             | <input checked="" type="checkbox"/> None |  |
| 13 | Other financial or non-financial interests                                                                   | <input checked="" type="checkbox"/> None |  |

**Please summarize the above conflict of interest in the following box:**

Mr. Verghese reports an unpaid consulting agreement with Jounce Therapeutics, Inc.

**Please place an "X" next to the following statement to indicate your agreement:**

**X I certify that I have answered every question and have not altered the wording of any of the questions on this form.**

## ICMJE DISCLOSURE FORM

**Date:** 4-21-2021

**Your Name:** Haeseong Park

**Manuscript Title:** A phase II study of everolimus in patients with advanced solid malignancies with TSC1, TSC2, NF1, NF2 or STK11 mutations

**Manuscript number (if known):**JTD-21-195-CL

In the interest of transparency, we ask you to disclose all relationships/activities/interests listed below that are related to the content of your manuscript. "Related" means any relation with for-profit or not-for-profit third parties whose interests may be affected by the content of the manuscript. Disclosure represents a commitment to transparency and does not necessarily indicate a bias. If you are in doubt about whether to list a relationship/activity/interest, it is preferable that you do so.

The following questions apply to the author's relationships/activities/interests as they relate to the current manuscript only.

The author's relationships/activities/interests should be defined broadly. For example, if your manuscript pertains to the epidemiology of hypertension, you should declare all relationships with manufacturers of antihypertensive medication, even if that medication is not mentioned in the manuscript.

In item #1 below, report all support for the work reported in this manuscript without time limit. For all other items, the time frame for disclosure is the past 36 months.

|                                                           |                                                                                                                                                                                | Name all entities with whom you have this relationship or indicate none (add rows as needed) | Specifications/Comments (e.g., if payments were made to you or to your institution)                                                              |
|-----------------------------------------------------------|--------------------------------------------------------------------------------------------------------------------------------------------------------------------------------|----------------------------------------------------------------------------------------------|--------------------------------------------------------------------------------------------------------------------------------------------------|
| <b>Time frame: Since the initial planning of the work</b> |                                                                                                                                                                                |                                                                                              |                                                                                                                                                  |
| 1                                                         | All support for the present manuscript (e.g., funding, provision of study materials, medical writing, article processing charges, etc.)<br><b>No time limit for this item.</b> | <u>  x  </u> None                                                                            |                                                                                                                                                  |
|                                                           |                                                                                                                                                                                |                                                                                              |                                                                                                                                                  |
|                                                           |                                                                                                                                                                                |                                                                                              |                                                                                                                                                  |
|                                                           |                                                                                                                                                                                |                                                                                              |                                                                                                                                                  |
|                                                           |                                                                                                                                                                                |                                                                                              |                                                                                                                                                  |
|                                                           |                                                                                                                                                                                |                                                                                              |                                                                                                                                                  |
| <b>Time frame: past 36 months</b>                         |                                                                                                                                                                                |                                                                                              |                                                                                                                                                  |
| 2                                                         | Grants or contracts from any entity (if not indicated in item #1 above).                                                                                                       | <u>    </u> None                                                                             | Payments made to my institution from below sponsors (site PI):<br>Ambrx<br>Amgen<br>Aprea Therapeutics AB<br>Array BioPharma<br>Bayer<br>BeiGene |

|   |                                                                                                              |                                          |                                                                                                                                                                                                                                                                                                                                                                                                                                                                                                                                                                                                                                                                                                                                       |
|---|--------------------------------------------------------------------------------------------------------------|------------------------------------------|---------------------------------------------------------------------------------------------------------------------------------------------------------------------------------------------------------------------------------------------------------------------------------------------------------------------------------------------------------------------------------------------------------------------------------------------------------------------------------------------------------------------------------------------------------------------------------------------------------------------------------------------------------------------------------------------------------------------------------------|
|   |                                                                                                              |                                          | BJ Bioscience<br>Bristol-Myers Squibb<br>Daiichi Pharmaceutical<br>Eli Lilly<br>Elicio Therapeutics<br>EMD Serono<br>Genentech<br>Gilead Sciences<br>GlaxoSmithKline<br>Gossamer Bio<br>Hoffman-LaRoche<br>Hutchison MediPharma<br>ImmuneOncia Therapeutics<br>Incyte<br>Jounce Therapeutics<br>Mabspace Biosciences<br>MacroGenics<br>Medimmune<br>Medivation<br>MERCK<br>Millennium<br>Mirati Therapeutics<br>Novartis Pharmaceuticals<br>Oncologie<br>Pfizer<br>PsiOxus Therapeutics<br>Puma Biotechnology<br>Regeneron Pharmaceuticals<br>Seattle Genetics<br>Synermore Biologics<br>Taiho Pharmaceutical<br>TopAlliance Biosciences<br>Turning Point Therapeutics<br>Vedanta Biosciences<br>Vertex Pharmaceuticals<br>Xencor Inc |
|   |                                                                                                              |                                          |                                                                                                                                                                                                                                                                                                                                                                                                                                                                                                                                                                                                                                                                                                                                       |
| 3 | Royalties or licenses                                                                                        | <input checked="" type="checkbox"/> None |                                                                                                                                                                                                                                                                                                                                                                                                                                                                                                                                                                                                                                                                                                                                       |
|   |                                                                                                              |                                          |                                                                                                                                                                                                                                                                                                                                                                                                                                                                                                                                                                                                                                                                                                                                       |
| 4 | Consulting fees                                                                                              | <input checked="" type="checkbox"/> None |                                                                                                                                                                                                                                                                                                                                                                                                                                                                                                                                                                                                                                                                                                                                       |
|   |                                                                                                              |                                          |                                                                                                                                                                                                                                                                                                                                                                                                                                                                                                                                                                                                                                                                                                                                       |
| 5 | Payment or honoraria for lectures, presentations, speakers bureaus, manuscript writing or educational events | <input checked="" type="checkbox"/> None |                                                                                                                                                                                                                                                                                                                                                                                                                                                                                                                                                                                                                                                                                                                                       |
|   |                                                                                                              |                                          |                                                                                                                                                                                                                                                                                                                                                                                                                                                                                                                                                                                                                                                                                                                                       |

|    |                                                                                                   |                                          |  |
|----|---------------------------------------------------------------------------------------------------|------------------------------------------|--|
| 6  | Payment for expert testimony                                                                      | <input type="checkbox"/> None            |  |
|    |                                                                                                   |                                          |  |
|    |                                                                                                   |                                          |  |
| 7  | Support for attending meetings and/or travel                                                      | <input checked="" type="checkbox"/> None |  |
|    |                                                                                                   |                                          |  |
|    |                                                                                                   |                                          |  |
| 8  | Patents planned, issued or pending                                                                | <input type="checkbox"/> None            |  |
|    |                                                                                                   |                                          |  |
|    |                                                                                                   |                                          |  |
| 9  | Participation on a Data Safety Monitoring Board or Advisory Board                                 | <input checked="" type="checkbox"/> None |  |
|    |                                                                                                   |                                          |  |
|    |                                                                                                   |                                          |  |
| 10 | Leadership or fiduciary role in other board, society, committee or advocacy group, paid or unpaid | <input type="checkbox"/> None            |  |
|    |                                                                                                   |                                          |  |
|    |                                                                                                   |                                          |  |
| 11 | Stock or stock options                                                                            | <input type="checkbox"/> None            |  |
|    |                                                                                                   |                                          |  |
|    |                                                                                                   |                                          |  |
| 12 | Receipt of equipment, materials, drugs, medical writing, gifts or other services                  | <input type="checkbox"/> None            |  |
|    |                                                                                                   |                                          |  |
|    |                                                                                                   |                                          |  |
| 13 | Other financial or non-financial interests                                                        | <input type="checkbox"/> None            |  |
|    |                                                                                                   |                                          |  |
|    |                                                                                                   |                                          |  |

**Please summarize the above conflict of interest in the following box:**

**Please place an "X" next to the following statement to indicate your agreement:**

I certify that I have answered every question and have not altered the wording of any of the questions on this form.

## ICMJE DISCLOSURE FORM

**Date:** 4-22-2021

**Your Name:** Luke Verghese

**Manuscript Title:** A phase II study of everolimus in patients with advanced solid malignancies with TSC1, TSC2, NF1, NF2 or STK11 mutations

**Manuscript number (if known):**JTD-21-195-CL

In the interest of transparency, we ask you to disclose all relationships/activities/interests listed below that are related to the content of your manuscript. "Related" means any relation with for-profit or not-for-profit third parties whose interests may be affected by the content of the manuscript. Disclosure represents a commitment to transparency and does not necessarily indicate a bias. If you are in doubt about whether to list a relationship/activity/interest, it is preferable that you do so.

The following questions apply to the author's relationships/activities/interests as they relate to the current manuscript only.

The author's relationships/activities/interests should be defined broadly. For example, if your manuscript pertains to the epidemiology of hypertension, you should declare all relationships with manufacturers of antihypertensive medication, even if that medication is not mentioned in the manuscript.

In item #1 below, report all support for the work reported in this manuscript without time limit. For all other items, the time frame for disclosure is the past 36 months.

|                                                           |                                                                                                                                                                                | Name all entities with whom you have this relationship or indicate none (add rows as needed) | Specifications/Comments (e.g., if payments were made to you or to your institution) |
|-----------------------------------------------------------|--------------------------------------------------------------------------------------------------------------------------------------------------------------------------------|----------------------------------------------------------------------------------------------|-------------------------------------------------------------------------------------|
| <b>Time frame: Since the initial planning of the work</b> |                                                                                                                                                                                |                                                                                              |                                                                                     |
| 1                                                         | All support for the present manuscript (e.g., funding, provision of study materials, medical writing, article processing charges, etc.)<br><b>No time limit for this item.</b> | <u> X </u> None                                                                              |                                                                                     |
|                                                           |                                                                                                                                                                                |                                                                                              |                                                                                     |
|                                                           |                                                                                                                                                                                |                                                                                              |                                                                                     |
|                                                           |                                                                                                                                                                                |                                                                                              |                                                                                     |
|                                                           |                                                                                                                                                                                |                                                                                              |                                                                                     |
|                                                           |                                                                                                                                                                                |                                                                                              |                                                                                     |
| <b>Time frame: past 36 months</b>                         |                                                                                                                                                                                |                                                                                              |                                                                                     |
| 2                                                         | Grants or contracts from any entity (if not indicated in item #1 above).                                                                                                       | <u> X </u> None                                                                              |                                                                                     |
|                                                           |                                                                                                                                                                                |                                                                                              |                                                                                     |
| 3                                                         | Royalties or licenses                                                                                                                                                          | <u> X </u> None                                                                              |                                                                                     |
|                                                           |                                                                                                                                                                                |                                                                                              |                                                                                     |
| 4                                                         | Consulting fees                                                                                                                                                                | X none                                                                                       |                                                                                     |
|                                                           |                                                                                                                                                                                |                                                                                              |                                                                                     |

|    |                                                                                                              |                                                                   |                |
|----|--------------------------------------------------------------------------------------------------------------|-------------------------------------------------------------------|----------------|
| 5  | Payment or honoraria for lectures, presentations, speakers bureaus, manuscript writing or educational events | <input checked="" type="checkbox"/> None                          |                |
| 6  | Payment for expert testimony                                                                                 | <input checked="" type="checkbox"/> None                          |                |
| 7  | Support for attending meetings and/or travel                                                                 | <input checked="" type="checkbox"/> None                          |                |
| 8  | Patents planned, issued or pending                                                                           | <input checked="" type="checkbox"/> None                          |                |
| 9  | Participation on a Data Safety Monitoring Board or Advisory Board                                            | Boehringer-Ingelheim,<br>Abbvie<br>Celgene<br>Takeda<br>PharmaMar | Advisory Board |
| 10 | Leadership or fiduciary role in other board, society, committee or advocacy group, paid or unpaid            | <input checked="" type="checkbox"/> None                          |                |
| 11 | Stock or stock options                                                                                       | <input checked="" type="checkbox"/> None                          |                |
| 12 | Receipt of equipment, materials, drugs, medical writing, gifts or other services                             | <input checked="" type="checkbox"/> None                          |                |
| 13 | Other financial or non-financial interests                                                                   | <input checked="" type="checkbox"/> None                          |                |

**Please summarize the above conflict of interest in the following box:**

Dr. Morgensztern has served on Advisory Boards for Boehringer-Ingelheim, Abbvie, Celgene, Takeda and PharmaMar outside of this submitted work.

**Please place an "X" next to the following statement to indicate your agreement:**

I certify that I have answered every question and have not altered the wording of any of the questions on this form.

## ICMJE DISCLOSURE FORM

**Date:** 4-22-2021

**Your Name:** Luke Verghese

**Manuscript Title:** A phase II study of everolimus in patients with advanced solid malignancies with TSC1, TSC2, NF1, NF2 or STK11 mutations

**Manuscript number (if known):**JTD-21-195-CL

In the interest of transparency, we ask you to disclose all relationships/activities/interests listed below that are related to the content of your manuscript. “Related” means any relation with for-profit or not-for-profit third parties whose interests may be affected by the content of the manuscript. Disclosure represents a commitment to transparency and does not necessarily indicate a bias. If you are in doubt about whether to list a relationship/activity/interest, it is preferable that you do so.

The following questions apply to the author’s relationships/activities/interests as they relate to the current manuscript only.

The author’s relationships/activities/interests should be defined broadly. For example, if your manuscript pertains to the epidemiology of hypertension, you should declare all relationships with manufacturers of antihypertensive medication, even if that medication is not mentioned in the manuscript.

In item #1 below, report all support for the work reported in this manuscript without time limit. For all other items, the time frame for disclosure is the past 36 months.

|                                                           |                                                                                                                                                                                | Name all entities with whom you have this relationship or indicate none (add rows as needed) | Specifications/Comments (e.g., if payments were made to you or to your institution) |
|-----------------------------------------------------------|--------------------------------------------------------------------------------------------------------------------------------------------------------------------------------|----------------------------------------------------------------------------------------------|-------------------------------------------------------------------------------------|
| <b>Time frame: Since the initial planning of the work</b> |                                                                                                                                                                                |                                                                                              |                                                                                     |
| 1                                                         | All support for the present manuscript (e.g., funding, provision of study materials, medical writing, article processing charges, etc.)<br><b>No time limit for this item.</b> | <u>  X  </u> None                                                                            |                                                                                     |
|                                                           |                                                                                                                                                                                |                                                                                              |                                                                                     |
|                                                           |                                                                                                                                                                                |                                                                                              |                                                                                     |
|                                                           |                                                                                                                                                                                |                                                                                              |                                                                                     |
|                                                           |                                                                                                                                                                                |                                                                                              |                                                                                     |
|                                                           |                                                                                                                                                                                |                                                                                              |                                                                                     |
| <b>Time frame: past 36 months</b>                         |                                                                                                                                                                                |                                                                                              |                                                                                     |
| 2                                                         | Grants or contracts from any entity (if not indicated in item #1 above).                                                                                                       | <u>  X  </u> None                                                                            |                                                                                     |
|                                                           |                                                                                                                                                                                |                                                                                              |                                                                                     |
| 3                                                         | Royalties or licenses                                                                                                                                                          | <u>  X  </u> None                                                                            |                                                                                     |
|                                                           |                                                                                                                                                                                |                                                                                              |                                                                                     |
| 4                                                         | Consulting fees                                                                                                                                                                | AbbVie, Eli Lilly and Company, AstraZeneca,                                                  | Consultant (self)                                                                   |

|    |                                                                                                              |                                                                                                                                                      |                       |
|----|--------------------------------------------------------------------------------------------------------------|------------------------------------------------------------------------------------------------------------------------------------------------------|-----------------------|
|    |                                                                                                              | Pfizer, Genentech, Millennium Pharm, F. Hoffmann-La Roche, NeoHealth, Janssen, Amgen, and GenePlus.                                                  |                       |
| 5  | Payment or honoraria for lectures, presentations, speakers bureaus, manuscript writing or educational events | <input checked="" type="checkbox"/> None                                                                                                             |                       |
| 6  | Payment for expert testimony                                                                                 | <input checked="" type="checkbox"/> None                                                                                                             |                       |
| 7  | Support for attending meetings and/or travel                                                                 | <input checked="" type="checkbox"/> None                                                                                                             |                       |
| 8  | Patents planned, issued or pending                                                                           | <input checked="" type="checkbox"/> None                                                                                                             |                       |
| 9  | Participation on a Data Safety Monitoring Board or Advisory Board                                            | AbbVie, Inivata, Pfizer, Genentech, Bristol-Myers Squibb, Roche, Nektar, Merck, Celgene, Partner Therapeutics, GlaxoSmithKline, Jounce, and Achilles | Advisory Board (self) |
| 10 | Leadership or fiduciary role in other board, society, committee or advocacy group, paid or unpaid            | <input checked="" type="checkbox"/> None                                                                                                             |                       |
| 11 | Stock or stock options                                                                                       | <input checked="" type="checkbox"/> None                                                                                                             |                       |
| 12 | Receipt of equipment, materials, drugs, medical writing, gifts or other services                             | <input checked="" type="checkbox"/> None                                                                                                             |                       |
| 13 | Other financial or non-financial interests                                                                   | <input checked="" type="checkbox"/> None                                                                                                             |                       |

**Please summarize the above conflict of interest in the following box:**

Dr Govindan has served on advisory boards for AbbVie, Inivata, Pfizer, Genentech, Bristol-Myers Squibb, Roche, Nektar, Merck, Celgene, Partner Therapeutics, GlaxoSmithKline, Jounce, and Achilles and has served as a consultant for AbbVie, Eli Lilly and Company, AstraZeneca, Pfizer, Genentech, Millennium Pharm, F. Hoffmann-La Roche, NeoHealth, Janssen, Amgen, and GenePlus.

Please place an "X" next to the following statement to indicate your agreement:

X I certify that I have answered every question and have not altered the wording of any of the questions on this form.

## ICMJE DISCLOSURE FORM

**Date:** 4-22-2021

**Your Name:** Rama Suresh

**Manuscript Title:** A phase II study of everolimus in patients with advanced solid malignancies with TSC1, TSC2, NF1, NF2 or STK11 mutations

**Manuscript number (if known):**JTD-21-195-CL

In the interest of transparency, we ask you to disclose all relationships/activities/interests listed below that are related to the content of your manuscript. "Related" means any relation with for-profit or not-for-profit third parties whose interests may be affected by the content of the manuscript. Disclosure represents a commitment to transparency and does not necessarily indicate a bias. If you are in doubt about whether to list a relationship/activity/interest, it is preferable that you do so.

The following questions apply to the author's relationships/activities/interests as they relate to the current manuscript only.

The author's relationships/activities/interests should be defined broadly. For example, if your manuscript pertains to the epidemiology of hypertension, you should declare all relationships with manufacturers of antihypertensive medication, even if that medication is not mentioned in the manuscript.

In item #1 below, report all support for the work reported in this manuscript without time limit. For all other items, the time frame for disclosure is the past 36 months.

|                                                           |                                                                                                                                                                                | Name all entities with whom you have this relationship or indicate none (add rows as needed) | Specifications/Comments (e.g., if payments were made to you or to your institution) |
|-----------------------------------------------------------|--------------------------------------------------------------------------------------------------------------------------------------------------------------------------------|----------------------------------------------------------------------------------------------|-------------------------------------------------------------------------------------|
| <b>Time frame: Since the initial planning of the work</b> |                                                                                                                                                                                |                                                                                              |                                                                                     |
| 1                                                         | All support for the present manuscript (e.g., funding, provision of study materials, medical writing, article processing charges, etc.)<br><b>No time limit for this item.</b> | <u>  X  </u> None                                                                            |                                                                                     |
|                                                           |                                                                                                                                                                                |                                                                                              |                                                                                     |
|                                                           |                                                                                                                                                                                |                                                                                              |                                                                                     |
|                                                           |                                                                                                                                                                                |                                                                                              |                                                                                     |
|                                                           |                                                                                                                                                                                |                                                                                              |                                                                                     |
| <b>Time frame: past 36 months</b>                         |                                                                                                                                                                                |                                                                                              |                                                                                     |
| 2                                                         | Grants or contracts from any entity (if not indicated in item #1 above).                                                                                                       | <u>  X  </u> None                                                                            |                                                                                     |
|                                                           |                                                                                                                                                                                |                                                                                              |                                                                                     |
| 3                                                         | Royalties or licenses                                                                                                                                                          | <u>  X  </u> None                                                                            |                                                                                     |
|                                                           |                                                                                                                                                                                |                                                                                              |                                                                                     |
| 4                                                         | Consulting fees                                                                                                                                                                | <u>  X  </u> None                                                                            |                                                                                     |
|                                                           |                                                                                                                                                                                |                                                                                              |                                                                                     |

|    |                                                                                                              |                                          |  |
|----|--------------------------------------------------------------------------------------------------------------|------------------------------------------|--|
|    |                                                                                                              |                                          |  |
| 5  | Payment or honoraria for lectures, presentations, speakers bureaus, manuscript writing or educational events | <input checked="" type="checkbox"/> None |  |
| 6  | Payment for expert testimony                                                                                 | <input checked="" type="checkbox"/> None |  |
| 7  | Support for attending meetings and/or travel                                                                 | <input checked="" type="checkbox"/> None |  |
| 8  | Patents planned, issued or pending                                                                           | <input checked="" type="checkbox"/> None |  |
| 9  | Participation on a Data Safety Monitoring Board or Advisory Board                                            | <input checked="" type="checkbox"/> None |  |
| 10 | Leadership or fiduciary role in other board, society, committee or advocacy group, paid or unpaid            | <input checked="" type="checkbox"/> None |  |
| 11 | Stock or stock options                                                                                       | <input checked="" type="checkbox"/> None |  |
| 12 | Receipt of equipment, materials, drugs, medical writing, gifts or other services                             | <input checked="" type="checkbox"/> None |  |
| 13 | Other financial or non-financial interests                                                                   | <input checked="" type="checkbox"/> None |  |

**Please summarize the above conflict of interest in the following box:**

**Please place an "X" next to the following statement to indicate your agreement:**

**X I certify that I have answered every question and have not altered the wording of any of the questions on this form.**

## ICMJE DISCLOSURE FORM

**Date:** 4-22-2021

**Your Name:** Peter Oppelt

**Manuscript Title:** A phase II study of everolimus in patients with advanced solid malignancies with TSC1, TSC2, NF1, NF2 or STK11 mutations

**Manuscript number (if known):**JTD-21-195-CL

In the interest of transparency, we ask you to disclose all relationships/activities/interests listed below that are related to the content of your manuscript. "Related" means any relation with for-profit or not-for-profit third parties whose interests may be affected by the content of the manuscript. Disclosure represents a commitment to transparency and does not necessarily indicate a bias. If you are in doubt about whether to list a relationship/activity/interest, it is preferable that you do so.

The following questions apply to the author's relationships/activities/interests as they relate to the current manuscript only.

The author's relationships/activities/interests should be defined broadly. For example, if your manuscript pertains to the epidemiology of hypertension, you should declare all relationships with manufacturers of antihypertensive medication, even if that medication is not mentioned in the manuscript.

In item #1 below, report all support for the work reported in this manuscript without time limit. For all other items, the time frame for disclosure is the past 36 months.

|                                                           |                                                                                                                                                                                | Name all entities with whom you have this relationship or indicate none (add rows as needed) | Specifications/Comments (e.g., if payments were made to you or to your institution) |
|-----------------------------------------------------------|--------------------------------------------------------------------------------------------------------------------------------------------------------------------------------|----------------------------------------------------------------------------------------------|-------------------------------------------------------------------------------------|
| <b>Time frame: Since the initial planning of the work</b> |                                                                                                                                                                                |                                                                                              |                                                                                     |
| 1                                                         | All support for the present manuscript (e.g., funding, provision of study materials, medical writing, article processing charges, etc.)<br><b>No time limit for this item.</b> | <u>  X  </u> None                                                                            |                                                                                     |
|                                                           |                                                                                                                                                                                |                                                                                              |                                                                                     |
|                                                           |                                                                                                                                                                                |                                                                                              |                                                                                     |
|                                                           |                                                                                                                                                                                |                                                                                              |                                                                                     |
|                                                           |                                                                                                                                                                                |                                                                                              |                                                                                     |
|                                                           |                                                                                                                                                                                |                                                                                              |                                                                                     |
| <b>Time frame: past 36 months</b>                         |                                                                                                                                                                                |                                                                                              |                                                                                     |
| 2                                                         | Grants or contracts from any entity (if not indicated in item #1 above).                                                                                                       | <u>  X  </u> None                                                                            |                                                                                     |
|                                                           |                                                                                                                                                                                |                                                                                              |                                                                                     |
| 3                                                         | Royalties or licenses                                                                                                                                                          | <u>  X  </u> None                                                                            |                                                                                     |
|                                                           |                                                                                                                                                                                |                                                                                              |                                                                                     |
| 4                                                         | Consulting fees                                                                                                                                                                | Bristol Myers, Merck, Eisai                                                                  | Personal fees                                                                       |
|                                                           |                                                                                                                                                                                |                                                                                              |                                                                                     |

|    |                                                                                                              |                                          |  |
|----|--------------------------------------------------------------------------------------------------------------|------------------------------------------|--|
|    |                                                                                                              |                                          |  |
| 5  | Payment or honoraria for lectures, presentations, speakers bureaus, manuscript writing or educational events | <input checked="" type="checkbox"/> None |  |
| 6  | Payment for expert testimony                                                                                 | <input checked="" type="checkbox"/> None |  |
| 7  | Support for attending meetings and/or travel                                                                 | <input checked="" type="checkbox"/> None |  |
| 8  | Patents planned, issued or pending                                                                           | <input checked="" type="checkbox"/> None |  |
| 9  | Participation on a Data Safety Monitoring Board or Advisory Board                                            | <input checked="" type="checkbox"/> None |  |
| 10 | Leadership or fiduciary role in other board, society, committee or advocacy group, paid or unpaid            | <input checked="" type="checkbox"/> None |  |
| 11 | Stock or stock options                                                                                       | <input checked="" type="checkbox"/> None |  |
| 12 | Receipt of equipment, materials, drugs, medical writing, gifts or other services                             | <input checked="" type="checkbox"/> None |  |
| 13 | Other financial or non-financial interests                                                                   | <input checked="" type="checkbox"/> None |  |

**Please summarize the above conflict of interest in the following box:**

Dr. Oppelt reports personal fees from Bristol Myers, personal fees from Merck, personal fees from Eisai, outside the submitted work.

**Please place an "X" next to the following statement to indicate your agreement:**

**X I certify that I have answered every question and have not altered the wording of any of the questions on this form.**

## ICMJE DISCLOSURE FORM

Date: 4-21-2021

Your Name:  Maria Q Bagstrom MD FACP

**Manuscript Title:** A phase II study of everolimus in patients with advanced solid malignancies with TSC1, TSC2, NF1, NF2 or STK11 mutations

**Manuscript number (if known):**JTD-21-195-CL

In the interest of transparency, we ask you to disclose all relationships/activities/interests listed below that are related to the content of your manuscript. "Related" means any relation with for-profit or not-for-profit third parties whose interests may be affected by the content of the manuscript. Disclosure represents a commitment to transparency and does not necessarily indicate a bias. If you are in doubt about whether to list a relationship/activity/interest, it is preferable that you do so.

The following questions apply to the author's relationships/activities/interests as they relate to the current manuscript only.

The author's relationships/activities/interests should be defined broadly. For example, if your manuscript pertains to the epidemiology of hypertension, you should declare all relationships with manufacturers of antihypertensive medication, even if that medication is not mentioned in the manuscript.

In item #1 below, report all support for the work reported in this manuscript without time limit. For all other items, the time frame for disclosure is the past 36 months.

|                                                           |                                                                                                                                                                                | Name all entities with whom you have this relationship or indicate none (add rows as needed) | Specifications/Comments (e.g., if payments were made to you or to your institution) |
|-----------------------------------------------------------|--------------------------------------------------------------------------------------------------------------------------------------------------------------------------------|----------------------------------------------------------------------------------------------|-------------------------------------------------------------------------------------|
| <b>Time frame: Since the initial planning of the work</b> |                                                                                                                                                                                |                                                                                              |                                                                                     |
| 1                                                         | All support for the present manuscript (e.g., funding, provision of study materials, medical writing, article processing charges, etc.)<br><b>No time limit for this item.</b> | <input checked="" type="checkbox"/> None                                                     |                                                                                     |
|                                                           |                                                                                                                                                                                |                                                                                              |                                                                                     |
|                                                           |                                                                                                                                                                                |                                                                                              |                                                                                     |
|                                                           |                                                                                                                                                                                |                                                                                              |                                                                                     |
|                                                           |                                                                                                                                                                                |                                                                                              |                                                                                     |
| <b>Time frame: past 36 months</b>                         |                                                                                                                                                                                |                                                                                              |                                                                                     |
| 2                                                         | Grants or contracts from any entity (if not indicated in item #1 above).                                                                                                       | <input checked="" type="checkbox"/> None                                                     |                                                                                     |
|                                                           |                                                                                                                                                                                |                                                                                              |                                                                                     |
| 3                                                         | Royalties or licenses                                                                                                                                                          | <input checked="" type="checkbox"/> None                                                     |                                                                                     |
|                                                           |                                                                                                                                                                                |                                                                                              |                                                                                     |
| 4                                                         | Consulting fees                                                                                                                                                                | <input checked="" type="checkbox"/> None                                                     |                                                                                     |

|    |                                                                                                              |                                          |                                                                                                                                                                                                    |
|----|--------------------------------------------------------------------------------------------------------------|------------------------------------------|----------------------------------------------------------------------------------------------------------------------------------------------------------------------------------------------------|
|    |                                                                                                              |                                          |                                                                                                                                                                                                    |
| 5  | Payment or honoraria for lectures, presentations, speakers bureaus, manuscript writing or educational events | <input checked="" type="checkbox"/> None |                                                                                                                                                                                                    |
| 6  | Payment for expert testimony                                                                                 | <input checked="" type="checkbox"/> None |                                                                                                                                                                                                    |
| 7  | Support for attending meetings and/or travel                                                                 | <input checked="" type="checkbox"/> None |                                                                                                                                                                                                    |
| 8  | Patents planned, issued or pending                                                                           | <input checked="" type="checkbox"/> None |                                                                                                                                                                                                    |
| 9  | Participation on a Data Safety Monitoring Board or Advisory Board                                            | <input checked="" type="checkbox"/> None |                                                                                                                                                                                                    |
| 10 | Leadership or fiduciary role in other board, society, committee or advocacy group, paid or unpaid            | <input type="checkbox"/> None            | ASCO<br>Lung Cancer Connection                                                                                                                                                                     |
|    |                                                                                                              |                                          | ASCO e-Learning Editorial Board<br>Board of Directors                                                                                                                                              |
| 11 | Stock or stock options                                                                                       | <input checked="" type="checkbox"/> None |                                                                                                                                                                                                    |
| 12 | Receipt of equipment, materials, drugs, medical writing, gifts or other services                             | <input checked="" type="checkbox"/> None |                                                                                                                                                                                                    |
| 13 | Other financial or non-financial interests                                                                   | <input type="checkbox"/> None            | Institutional principal investigator for studies funded by Medimmune, AstraZeneca, Millenium, CRAB, Bristol Myers Squibb, and Alliance for Clinical Trials in Oncology, outside the submitted work |

**Please summarize the above conflict of interest in the following box:**

Institutional principal investigator for studies funded by Medimmune, AstraZeneca, Millenium, CRAB, Bristol Myers Squibb, and Alliance for Clinical Trials in Oncology, outside the submitted work.

American Society of Clinical Oncology e-Learning Editorial Board.

Lung Cancer Connection, Board of Directors

Please place an "X" next to the following statement to indicate your agreement:

  X   I certify that I have answered every question and have not altered the wording of any of the questions on this form.

## ICMJE DISCLOSURE FORM

**Date:** 4-21-2021

**Your Name:** Ningying WU

**Manuscript Title:** A phase II study of everolimus in patients with advanced solid malignancies with TSC1, TSC2, NF1, NF2 or STK11 mutations

**Manuscript number (if known):**JTD-21-195-CL

In the interest of transparency, we ask you to disclose all relationships/activities/interests listed below that are related to the content of your manuscript. "Related" means any relation with for-profit or not-for-profit third parties whose interests may be affected by the content of the manuscript. Disclosure represents a commitment to transparency and does not necessarily indicate a bias. If you are in doubt about whether to list a relationship/activity/interest, it is preferable that you do so.

The following questions apply to the author's relationships/activities/interests as they relate to the current manuscript only.

The author's relationships/activities/interests should be defined broadly. For example, if your manuscript pertains to the epidemiology of hypertension, you should declare all relationships with manufacturers of antihypertensive medication, even if that medication is not mentioned in the manuscript.

In item #1 below, report all support for the work reported in this manuscript without time limit. For all other items, the time frame for disclosure is the past 36 months.

|                                                           |                                                                                                                                                                                | Name all entities with whom you have this relationship or indicate none (add rows as needed) | Specifications/Comments (e.g., if payments were made to you or to your institution) |
|-----------------------------------------------------------|--------------------------------------------------------------------------------------------------------------------------------------------------------------------------------|----------------------------------------------------------------------------------------------|-------------------------------------------------------------------------------------|
| <b>Time frame: Since the initial planning of the work</b> |                                                                                                                                                                                |                                                                                              |                                                                                     |
| 1                                                         | All support for the present manuscript (e.g., funding, provision of study materials, medical writing, article processing charges, etc.)<br><b>No time limit for this item.</b> | <u>  X  </u> None                                                                            |                                                                                     |
|                                                           |                                                                                                                                                                                |                                                                                              |                                                                                     |
|                                                           |                                                                                                                                                                                |                                                                                              |                                                                                     |
|                                                           |                                                                                                                                                                                |                                                                                              |                                                                                     |
|                                                           |                                                                                                                                                                                |                                                                                              |                                                                                     |
|                                                           |                                                                                                                                                                                |                                                                                              |                                                                                     |
| <b>Time frame: past 36 months</b>                         |                                                                                                                                                                                |                                                                                              |                                                                                     |
| 2                                                         | Grants or contracts from any entity (if not indicated in item #1 above).                                                                                                       | <u>  X  </u> None                                                                            |                                                                                     |
|                                                           |                                                                                                                                                                                |                                                                                              |                                                                                     |
| 3                                                         | Royalties or licenses                                                                                                                                                          | <u>  X  </u> None                                                                            |                                                                                     |
|                                                           |                                                                                                                                                                                |                                                                                              |                                                                                     |
| 4                                                         | Consulting fees                                                                                                                                                                | <u>  X  </u> None                                                                            |                                                                                     |
|                                                           |                                                                                                                                                                                |                                                                                              |                                                                                     |

|    |                                                                                                              |                                          |  |
|----|--------------------------------------------------------------------------------------------------------------|------------------------------------------|--|
|    |                                                                                                              |                                          |  |
| 5  | Payment or honoraria for lectures, presentations, speakers bureaus, manuscript writing or educational events | <input checked="" type="checkbox"/> None |  |
| 6  | Payment for expert testimony                                                                                 | <input checked="" type="checkbox"/> None |  |
| 7  | Support for attending meetings and/or travel                                                                 | <input checked="" type="checkbox"/> None |  |
| 8  | Patents planned, issued or pending                                                                           | <input checked="" type="checkbox"/> None |  |
| 9  | Participation on a Data Safety Monitoring Board or Advisory Board                                            | <input checked="" type="checkbox"/> None |  |
| 10 | Leadership or fiduciary role in other board, society, committee or advocacy group, paid or unpaid            | <input checked="" type="checkbox"/> None |  |
| 11 | Stock or stock options                                                                                       | <input checked="" type="checkbox"/> None |  |
| 12 | Receipt of equipment, materials, drugs, medical writing, gifts or other services                             | <input checked="" type="checkbox"/> None |  |
| 13 | Other financial or non-financial interests                                                                   | <input checked="" type="checkbox"/> None |  |

**Please summarize the above conflict of interest in the following box:**

**Please place an "X" next to the following statement to indicate your agreement:**

**X I certify that I have answered every question and have not altered the wording of any of the questions on this form.**

## ICMJE DISCLOSURE FORM

Date: 4-22-2021 \_\_\_\_\_

Your Name: Saiama N Waqar \_\_\_\_\_

Manuscript Title: A phase II study of everolimus in patients with advanced solid malignancies with TSC1, TSC2, NF1, NF2 or STK11 mutations

Manuscript number (if known): \_\_\_\_\_ JTD-21-195-CL \_\_\_\_\_

In the interest of transparency, we ask you to disclose all relationships/activities/interests listed below that are related to the content of your manuscript. "Related" means any relation with for-profit or not-for-profit third parties whose interests may be affected by the content of the manuscript. Disclosure represents a commitment to transparency and does not necessarily indicate a bias. If you are in doubt about whether to list a relationship/activity/interest, it is preferable that you do so.

The following questions apply to the author's relationships/activities/interests as they relate to the current manuscript only.

The author's relationships/activities/interests should be defined broadly. For example, if your manuscript pertains to the epidemiology of hypertension, you should declare all relationships with manufacturers of antihypertensive medication, even if that medication is not mentioned in the manuscript.

In item #1 below, report all support for the work reported in this manuscript without time limit. For all other items, the time frame for disclosure is the past 36 months.

|                                                           |                                                                                                                                                                                | Name all entities with whom you have this relationship or indicate none (add rows as needed) | Specifications/Comments (e.g., if payments were made to you or to your institution)                                      |
|-----------------------------------------------------------|--------------------------------------------------------------------------------------------------------------------------------------------------------------------------------|----------------------------------------------------------------------------------------------|--------------------------------------------------------------------------------------------------------------------------|
| <b>Time frame: Since the initial planning of the work</b> |                                                                                                                                                                                |                                                                                              |                                                                                                                          |
| 1                                                         | All support for the present manuscript (e.g., funding, provision of study materials, medical writing, article processing charges, etc.)<br><b>No time limit for this item.</b> | _____ None                                                                                   |                                                                                                                          |
|                                                           |                                                                                                                                                                                | Novartis Pharmaceuticals                                                                     | The trial was sponsored by Novartis Pharmaceuticals (institution)                                                        |
|                                                           |                                                                                                                                                                                |                                                                                              |                                                                                                                          |
|                                                           |                                                                                                                                                                                |                                                                                              |                                                                                                                          |
|                                                           |                                                                                                                                                                                |                                                                                              |                                                                                                                          |
|                                                           |                                                                                                                                                                                |                                                                                              |                                                                                                                          |
| <b>Time frame: past 36 months</b>                         |                                                                                                                                                                                |                                                                                              |                                                                                                                          |
| 2                                                         | Grants or contracts from any entity (if not indicated in item #1 above).                                                                                                       |                                                                                              |                                                                                                                          |
|                                                           |                                                                                                                                                                                | SWOG-Clinical Trials Partnership                                                             | This funding provides effort for Dr. Waqar to support and oversee the Lung-MAP master protocol and sub study activities. |
|                                                           |                                                                                                                                                                                |                                                                                              |                                                                                                                          |

|    |                                                                                                              |                                               |                                                 |
|----|--------------------------------------------------------------------------------------------------------------|-----------------------------------------------|-------------------------------------------------|
| 3  | Royalties or licenses                                                                                        | ____ None                                     |                                                 |
| 4  | Consulting fees                                                                                              | ____ None                                     |                                                 |
| 5  | Payment or honoraria for lectures, presentations, speakers bureaus, manuscript writing or educational events | American Society for Clinical Oncology (ASCO) | ASCO 2020 Question Writing Group                |
| 6  | Payment for expert testimony                                                                                 | ____ None                                     |                                                 |
| 7  | Support for attending meetings and/or travel                                                                 | ____ None                                     |                                                 |
| 8  | Patents planned, issued or pending                                                                           | ____ None                                     |                                                 |
| 9  | Participation on a Data Safety Monitoring Board or Advisory Board                                            | Hoosier Cancer Research Network               | Chair of Data Safety Monitoring Board for study |
| 10 | Leadership or fiduciary role in other board, society, committee or advocacy group, paid or unpaid            | ____ None                                     |                                                 |
| 11 | Stock or stock options                                                                                       | ____ None                                     |                                                 |
| 12 | Receipt of equipment, materials, drugs, medical writing, gifts or other services                             | ____ None                                     |                                                 |
| 13 | Other financial or non-financial interests                                                                   | ____ None                                     |                                                 |

**Please summarize the above conflict of interest in the following box:**

Dr Waqar reports that the trial is supported by Novartis Pharmaceuticals. She reports funding from the SWOG-Clinical Trials Partnership for her to oversee the Lung-MAP master protocol and sub-study activities. She also reports honoraria from the American Society for Clinical Oncology (ASCO) and serves as Chair of Data Safety Monitoring Board for a study through the Hoosier Oncology Group.

**Please place an "X" next to the following statement to indicate your agreement:**

**X I certify that I have answered every question and have not altered the wording of any of the questions on this**

**form.**
