# Supplementary material for: A phase II study of everolimus in patients with advanced solid malignancies with TSC1, TSC2, NF1, NF2 or STK11 mutations
Source: PubMed Central journal article supplement — J Thorac Dis. 2021 Jul;13(7):4054–62. doi: 10.21037/jtd-21-195 (PMC8339787; doi:10.21037/jtd-21-195), 2021-07
Supplement: jtd-13-07-4054-dss.pdf [file jtd-13-07-4054-dss.pdf]

## Data Sharing Statement

|                     |                                                                                                                                                     |                                                                                                                  |
|---------------------|-----------------------------------------------------------------------------------------------------------------------------------------------------|------------------------------------------------------------------------------------------------------------------|
| <b>Article Info</b> | <a href="http://dx.doi.org/10.21037/jtd-21-195">http://dx.doi.org/10.21037/jtd-21-195</a>                                                           |                                                                                                                  |
| <b>Item</b>         | <b>Question</b>                                                                                                                                     | <b>Authors' Response<br/>(place "-" if not applicable)</b>                                                       |
| 1                   | Would you like to share data collected for your study to others?                                                                                    | Yes                                                                                                              |
| 2                   | If not, would you like to share the reason for your decision?                                                                                       | -                                                                                                                |
| 3                   | What data in particular will be shared?                                                                                                             | Toxicity table.                                                                                                  |
| 4                   | Any other documents will be shared? Such as study protocol, statistical analysis plan, informed consent form, clinical study report, analytic code. | No.                                                                                                              |
| 5                   | When will data availability begin?                                                                                                                  | From publication date.                                                                                           |
| 6                   | When will data availability end?                                                                                                                    | 1 year from publication date.                                                                                    |
| 7                   | To whom will you share the data?                                                                                                                    | Medical Oncologists interested in everolimus.                                                                    |
| 8                   | For what type of analysis or purpose?                                                                                                               | Understanding toxicity.                                                                                          |
| 9                   | How or where can the data/documents be obtained?                                                                                                    | Email: <a href="mailto:saiamawaqar@wustl.edu">saiamawaqar@wustl.edu</a>                                          |
| 10                  | Any other restrictions?                                                                                                                             | We may balance the potential benefits and risks for each request and then provide the data that could be shared. |
